# Supplementary material for: SOCS3 treatment prevents the development of alopecia areata by inhibiting CD8+ T cell-mediated autoimmune destruction
Source: PubMed Central journal article supplement (PMC5464880; doi:10.18632/oncotarget.16504), 2017-03-23
Supplement: oncotarget-08-33432-s001.pdf [file oncotarget-08-33432-s001.pdf]

## **SOCS3 treatment prevents the development of alopecia areata by inhibiting CD8+ T cell-mediated autoimmune destruction**

### **SUPPLEMENTARY TABLES**

**Supplementary Table 1: The qPCR array assays 84 genes involved in AA**

**See Supplementary File 1**

**Supplementary Table 2: qPCR primers used in the study**

**See Supplementary File 2**
